# Supplementary material
Source: publisher figshare collection journal article supplement (https://asha.figshare.com/articles/dataset/_/6170219)
Supplement: Supplementary file 1 [file 1]

**Supplemental Table 1.** Verbs used in VNeST treatment and corresponding sentences used in sentence probes.

| Verb Set 1 | Verb Set 2 | Sentences for Verb Set 1                | Sentences for Verb Set 2             |
|------------|------------|-----------------------------------------|--------------------------------------|
| Bend       | Fold       | The plumber is bending the pipe.        | The waiter is folding the napkin.    |
| Bite       | Chew       | The snake is biting the hand.           | The dog is chewing the bone.         |
| Boil       | Fry        | The chef is boiling the corn.           | The cowboy is frying the eggs.       |
| Brush      | Shave      | The patient is brushing his hair.       | The barber is shaving his face.      |
| Carry      | Hold       | The tourist is carrying the suitcase.   | The fireman is holding the cat.      |
| Chop       | Slice      | The lumberjack is chopping the tree.    | The butcher is slicing the ham.      |
| Drive      | Fly        | The chauffeur is driving the limousine. | The pilot is flying the airplane.    |
| Erase      | Scrub      | The teacher is erasing the board.       | The maid is scrubbing the floor.     |
| Kick       | Throw      | The horse is kicking the fence.         | The clown is throwing the pie.       |
| Knit       | Sew        | The nun is knitting a sweater.          | The tailor is sewing the jacket.     |
| Measure    | Weigh      | The carpenter is measuring the lumber.  | The farmer is weighing the apples.   |
| Pull       | Push       | The dentist is pulling the tooth.       | The nurse is pushing the wheelchair. |

*Note.* VNeST = Verb Network Strengthening Treatment.
